# Supplementary material
Source: Research Square preprint supplement (doi:10.21203/rs.3.rs-8814093/v1)

**Table 1**. General knowledge regarding anti-resorptive medication and MRONJ
(% of Yes answers)


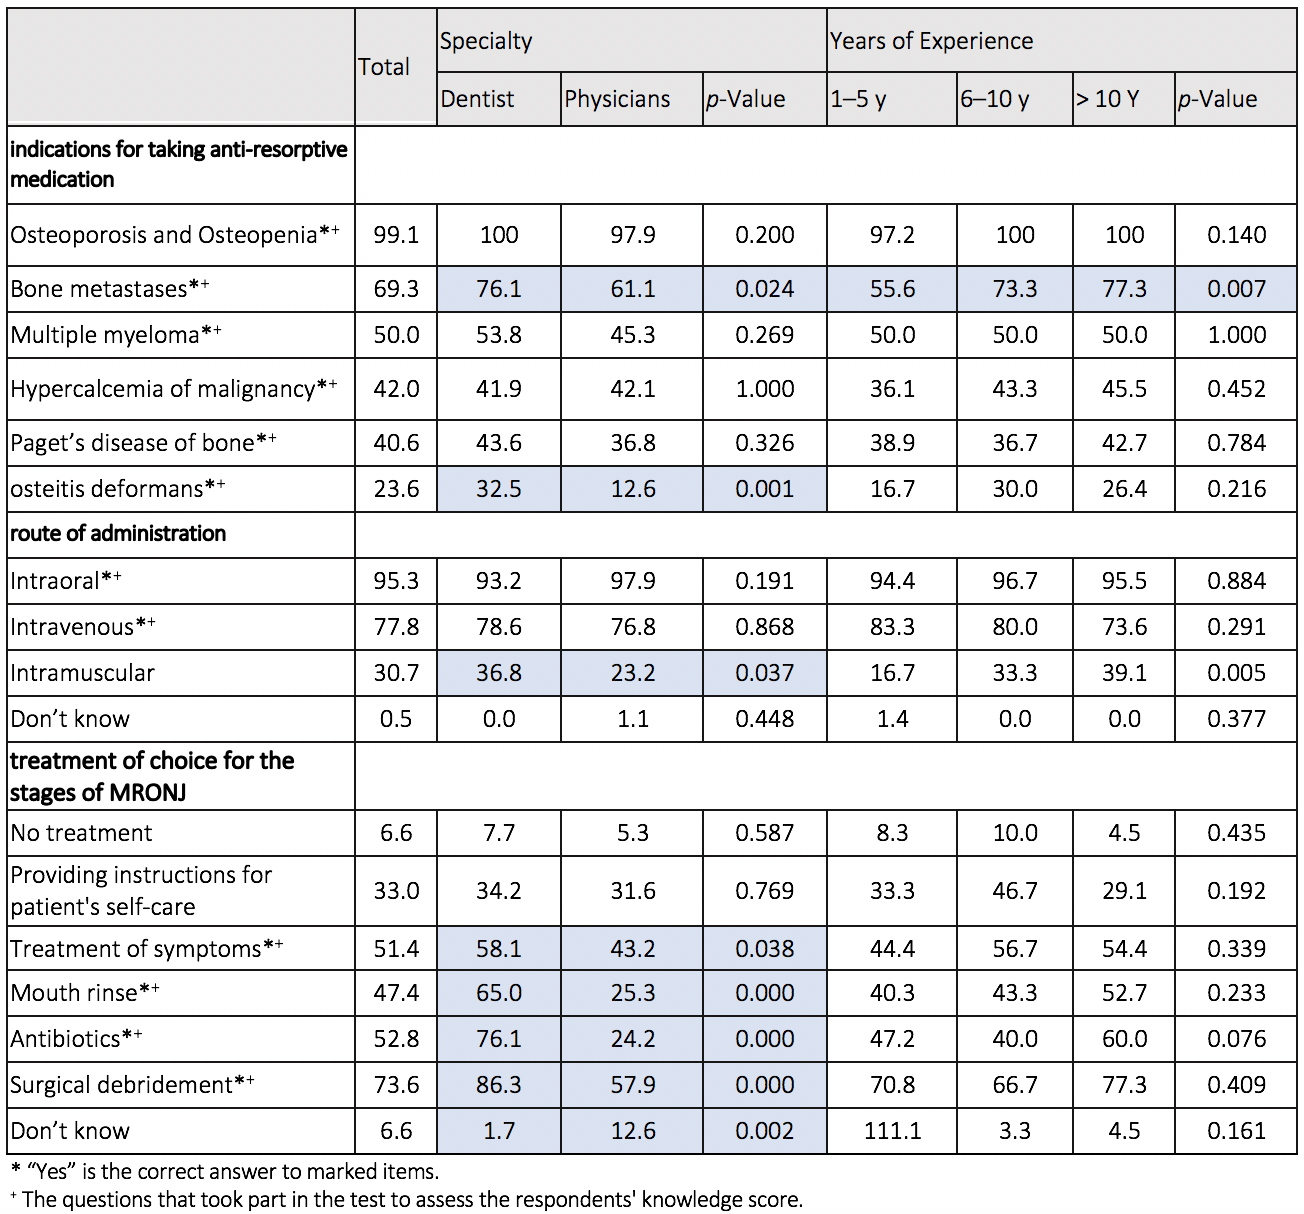


**Table 2**. Knowledge regarding risk factors and clinical features of MRONJ
 (% of correct answers)


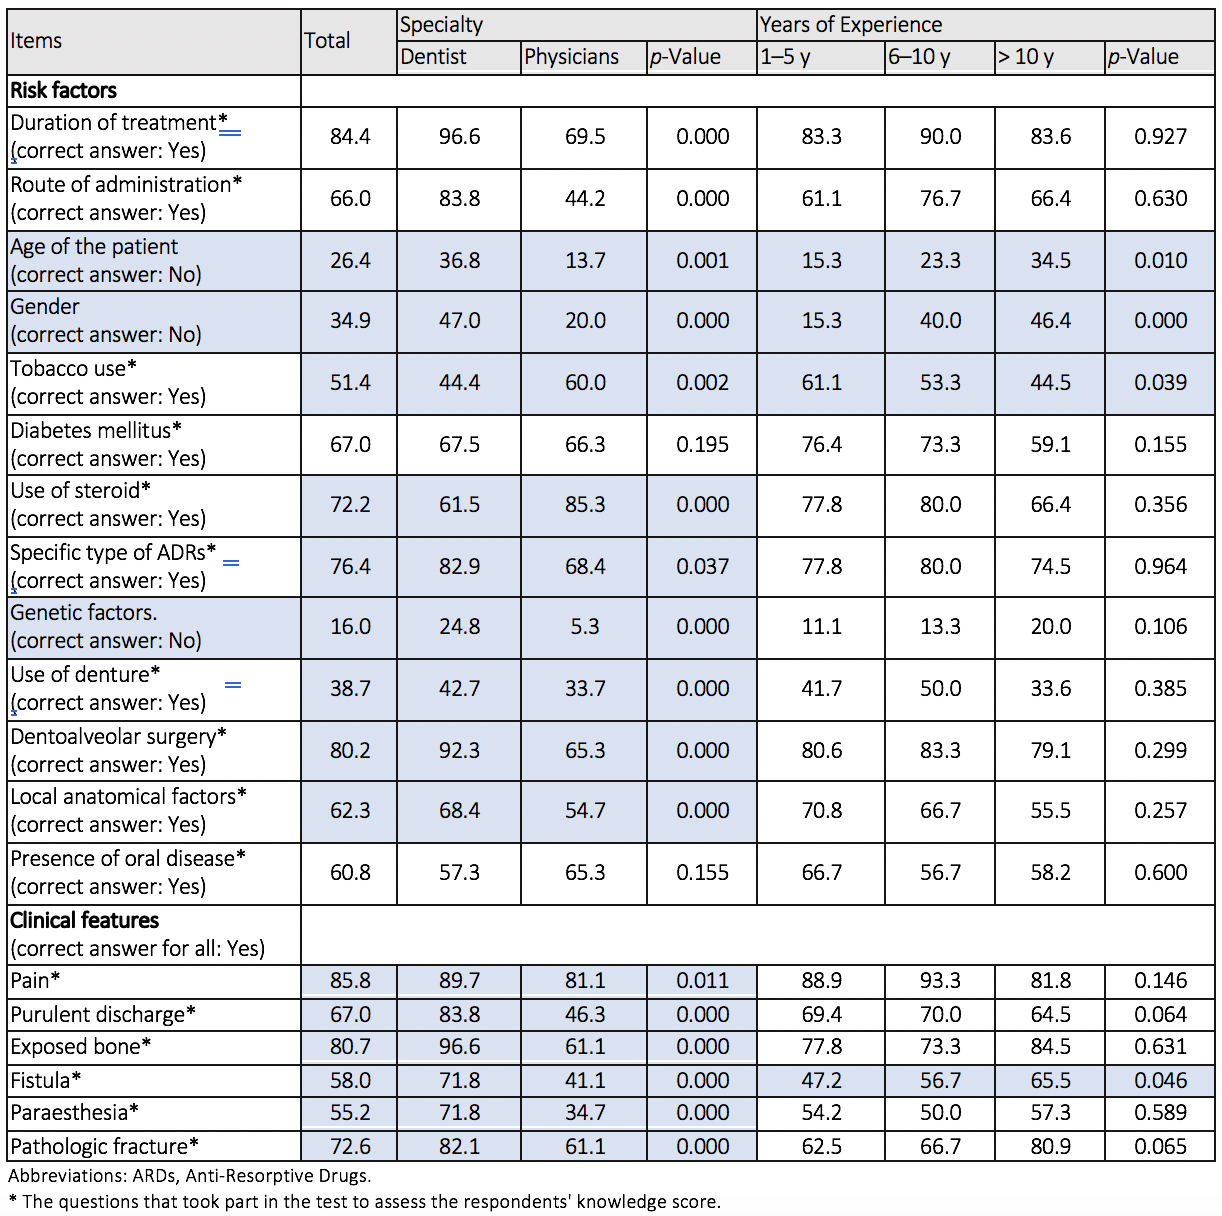


**Table 3**. Data of the preferences of sources of information regarding MRONJ (% of Yes answers)


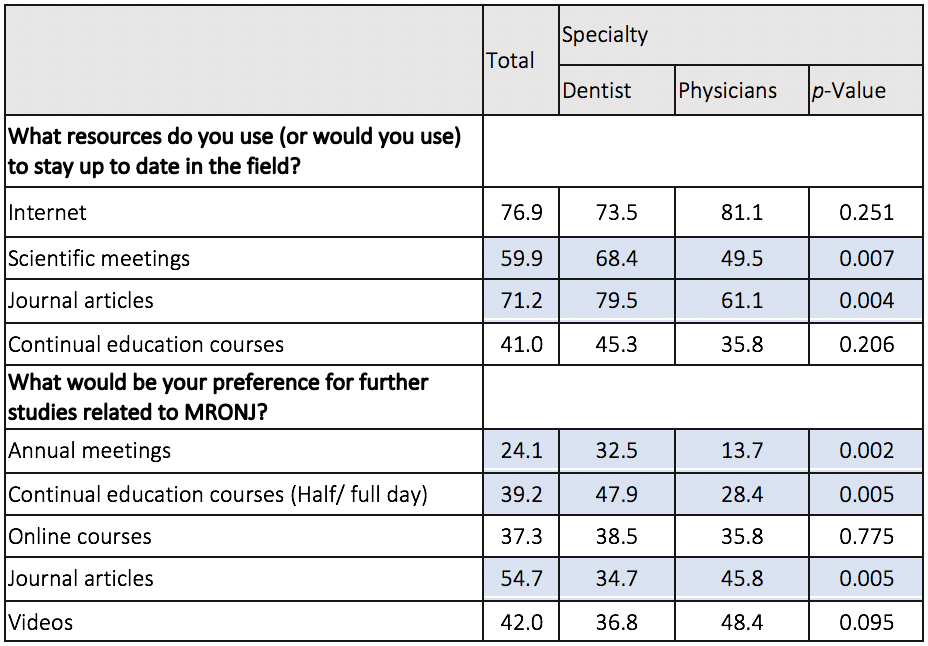

Supplement: Supplementary file 2 [file e453fa719c8806372f5c0732.docx]
