# Supplementary material
Source: Research Square preprint supplement (doi:10.21203/rs.3.rs-8814093/v1)

**Appendix**

**A - Ethics Committee Approval- Clalit Sick Fund**

**
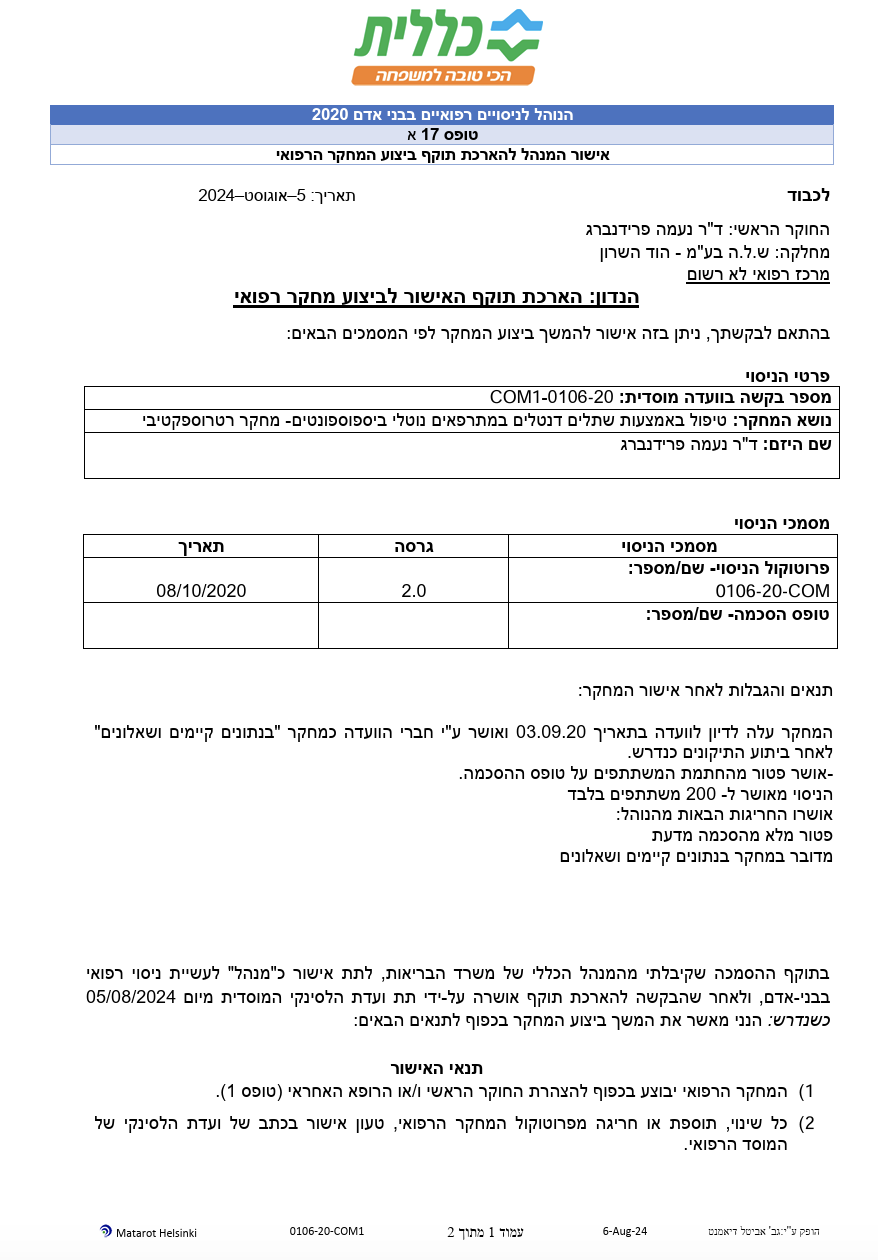
**
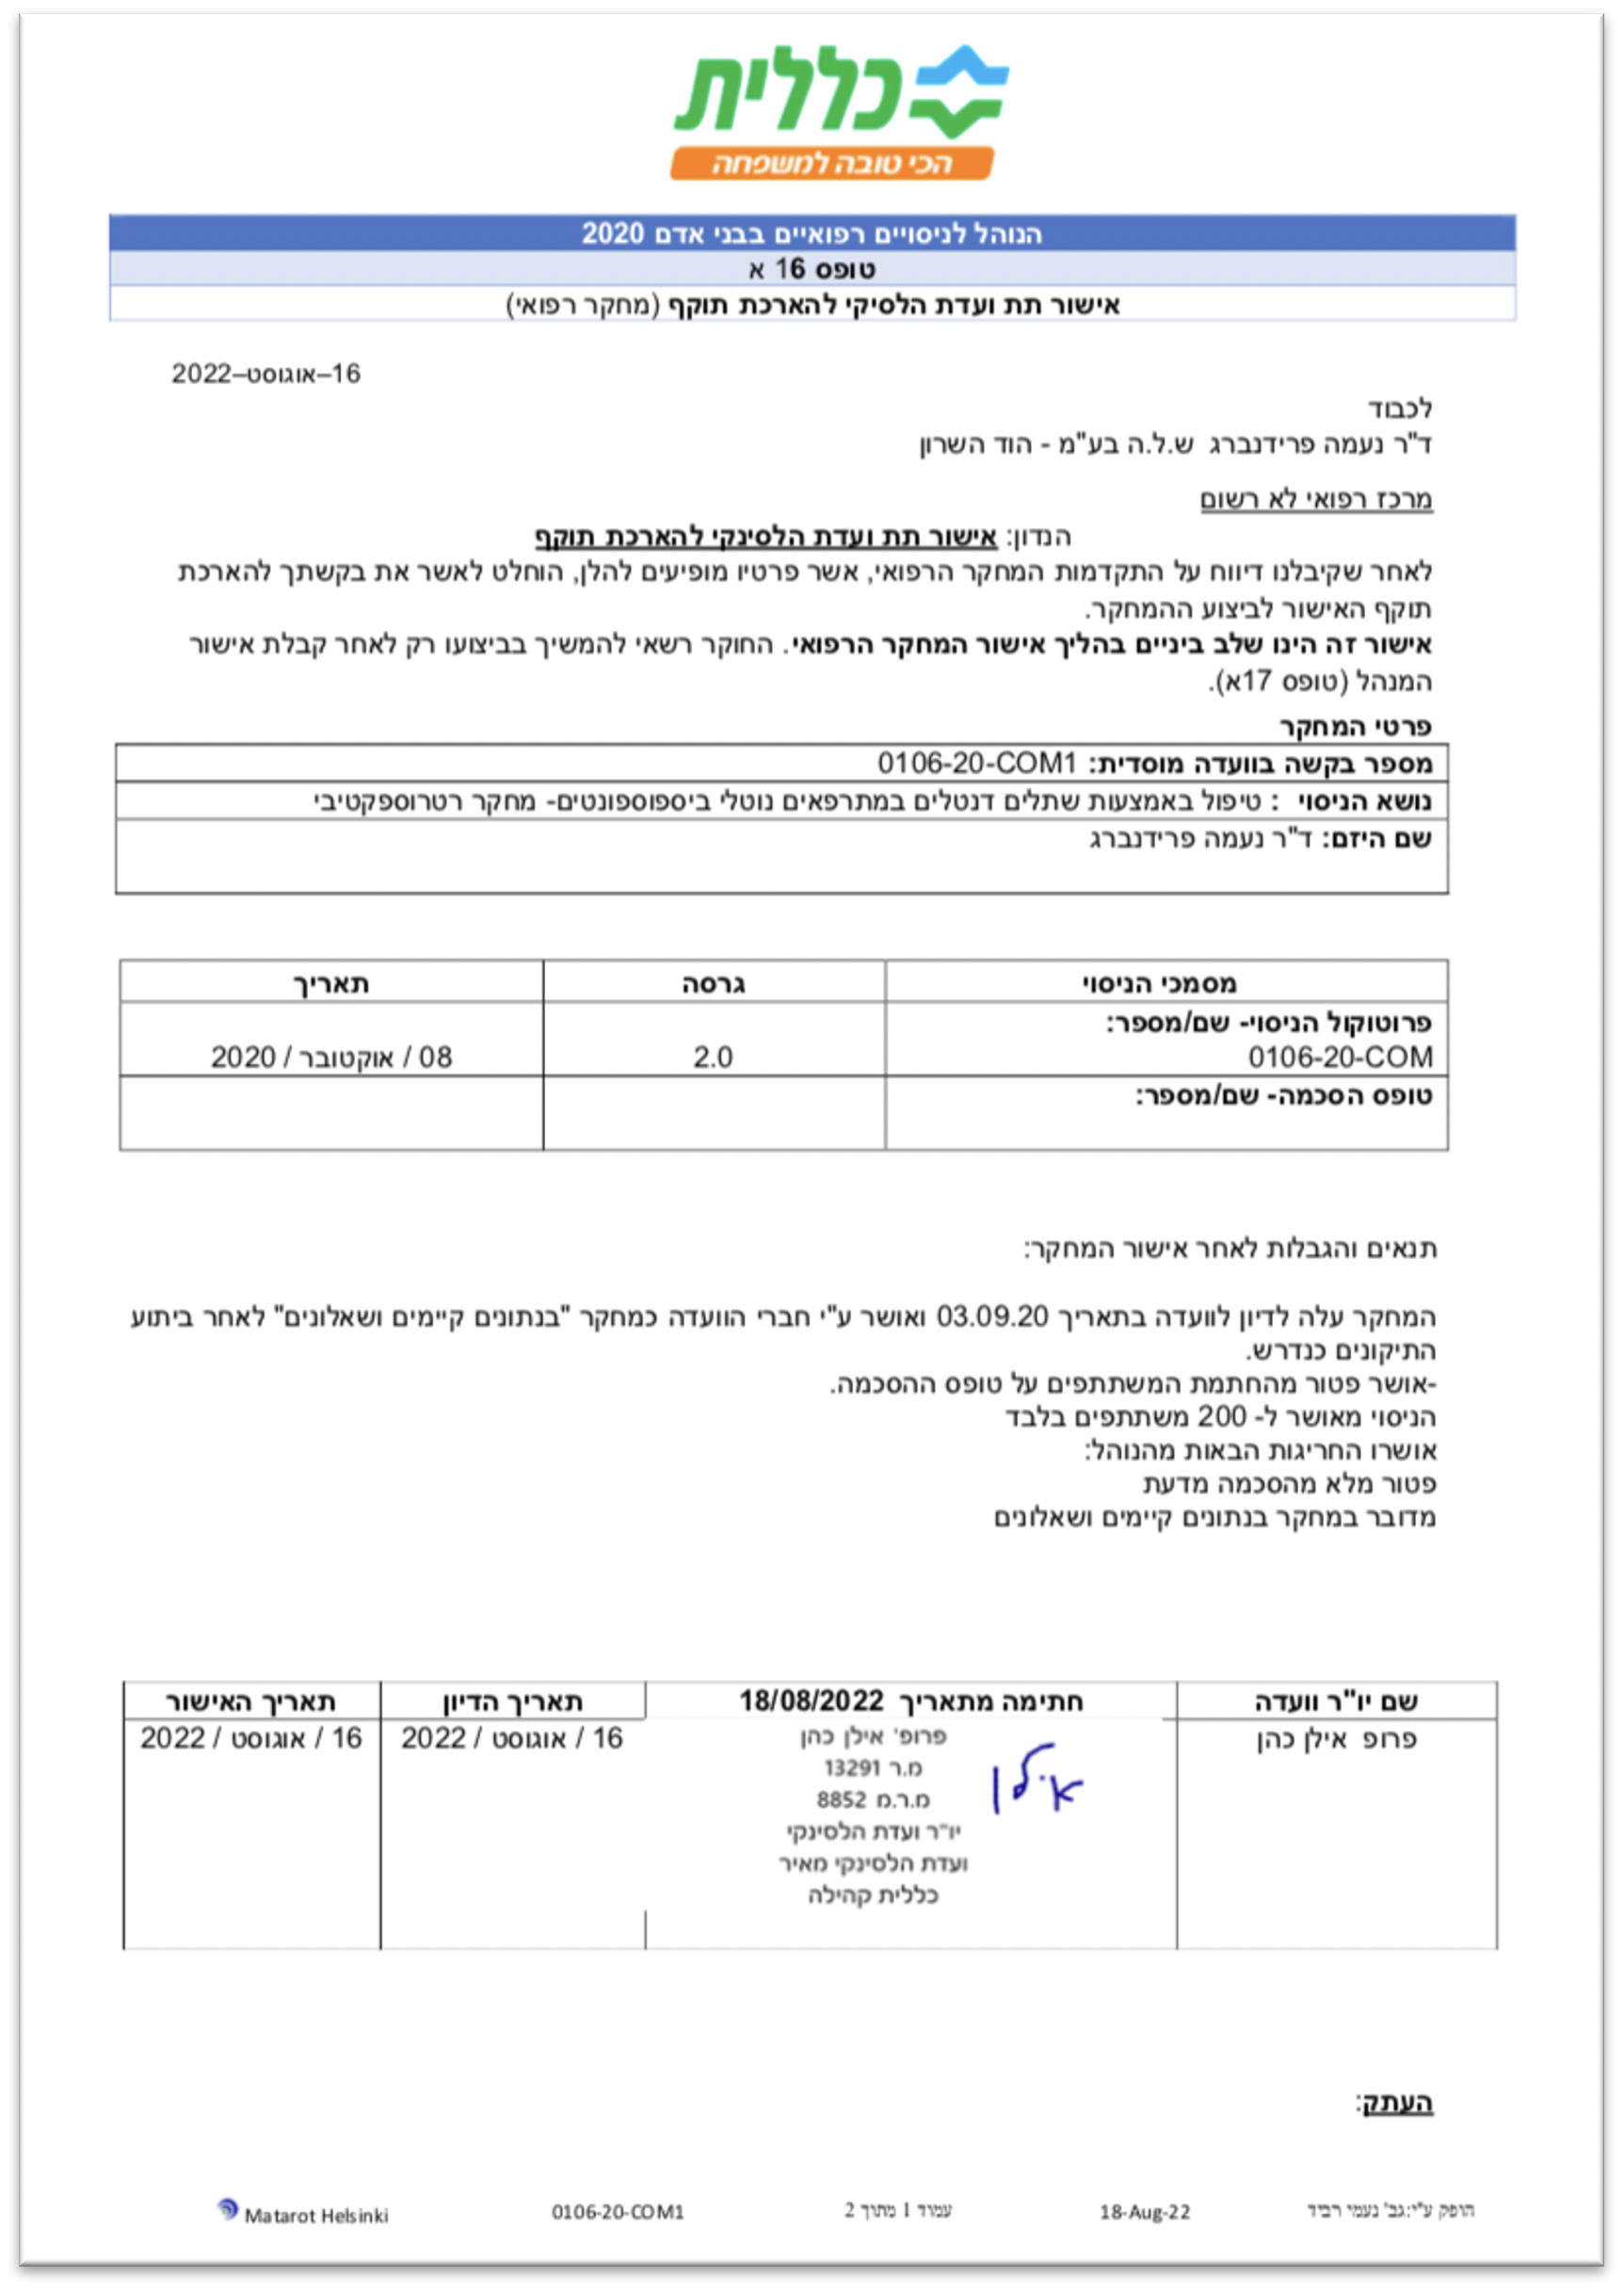


**
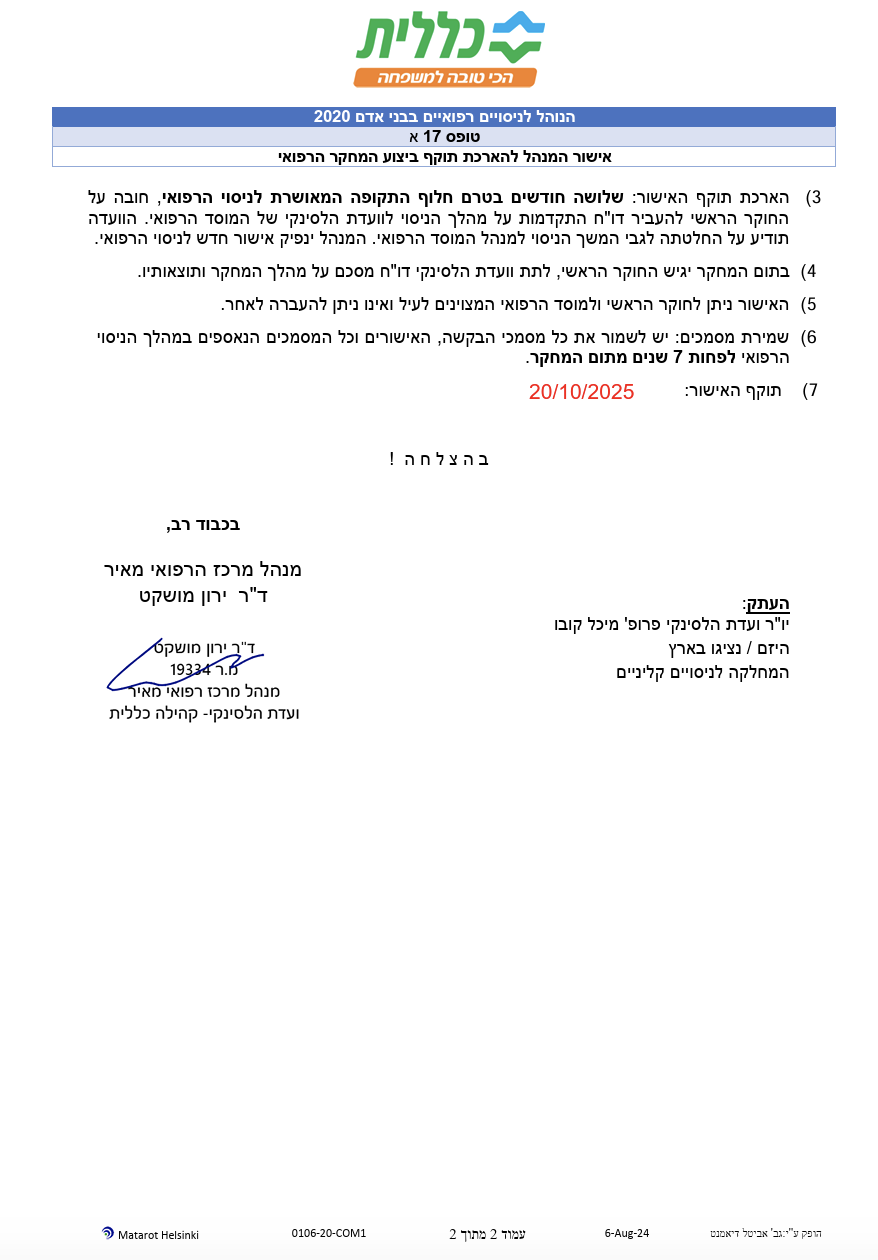
**

**B - The questionnaire**

**
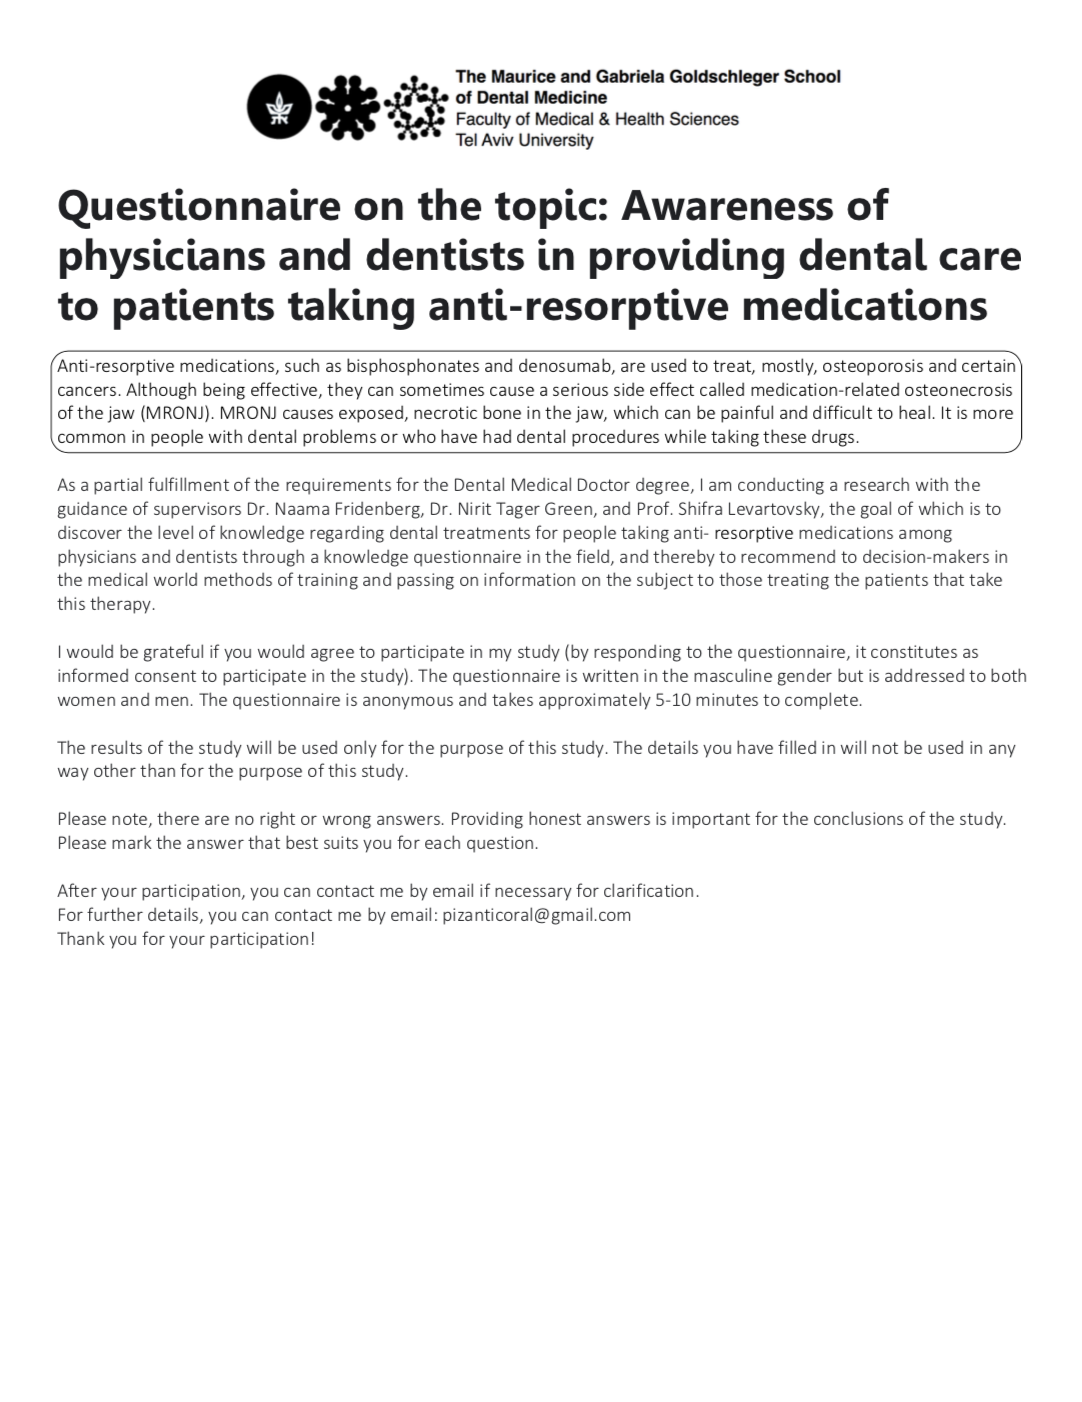
**


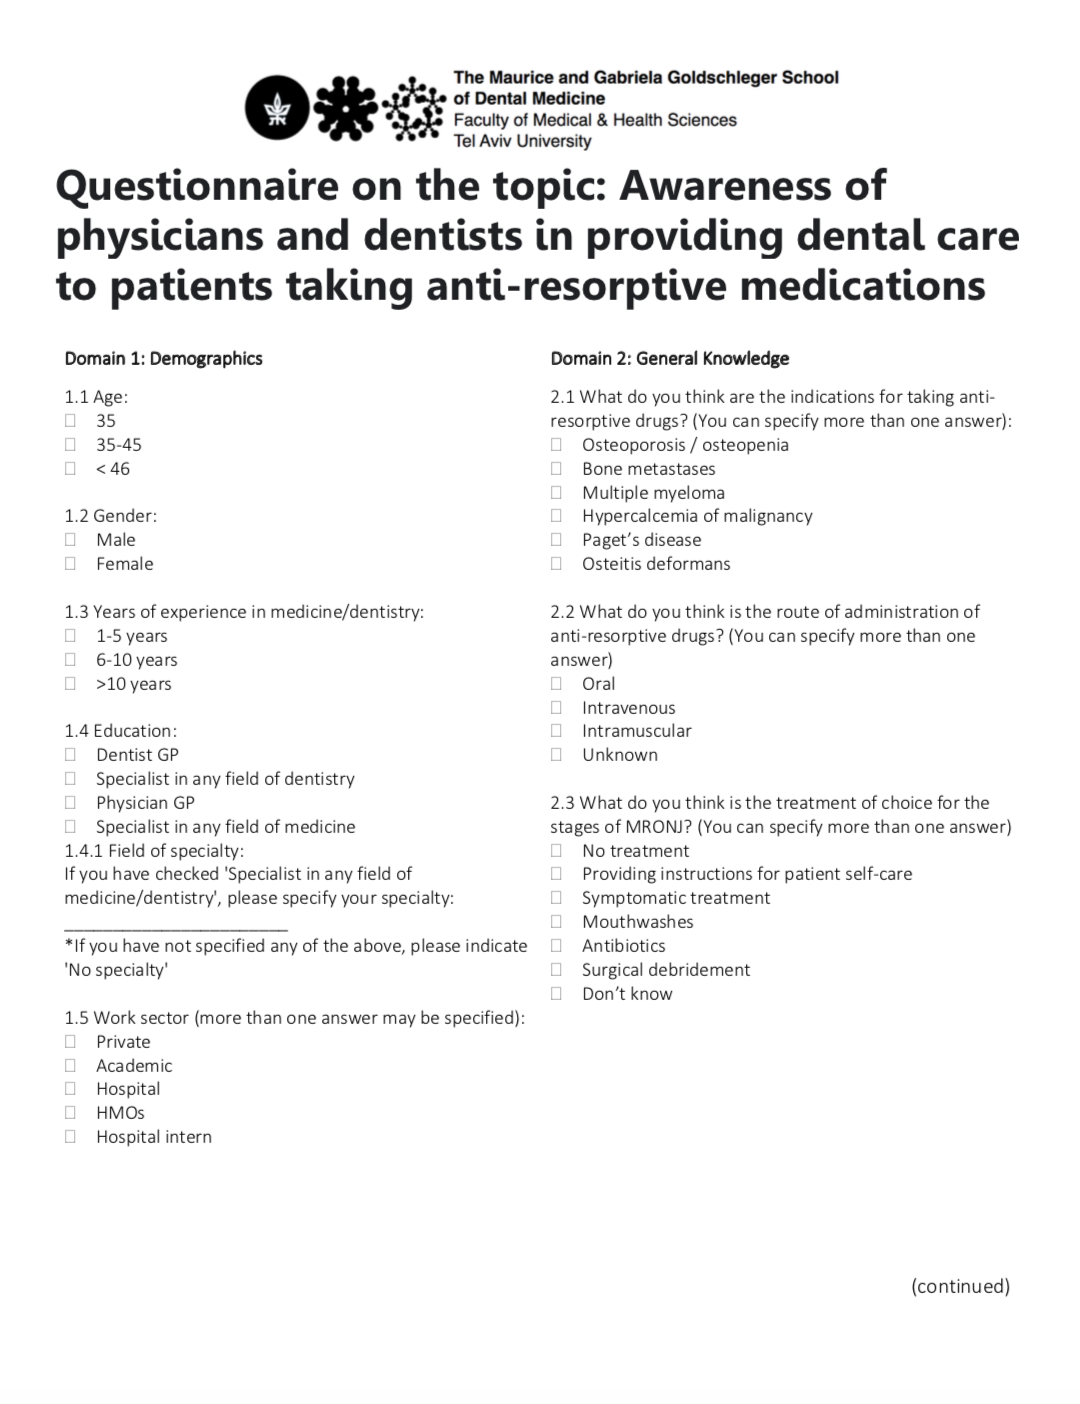


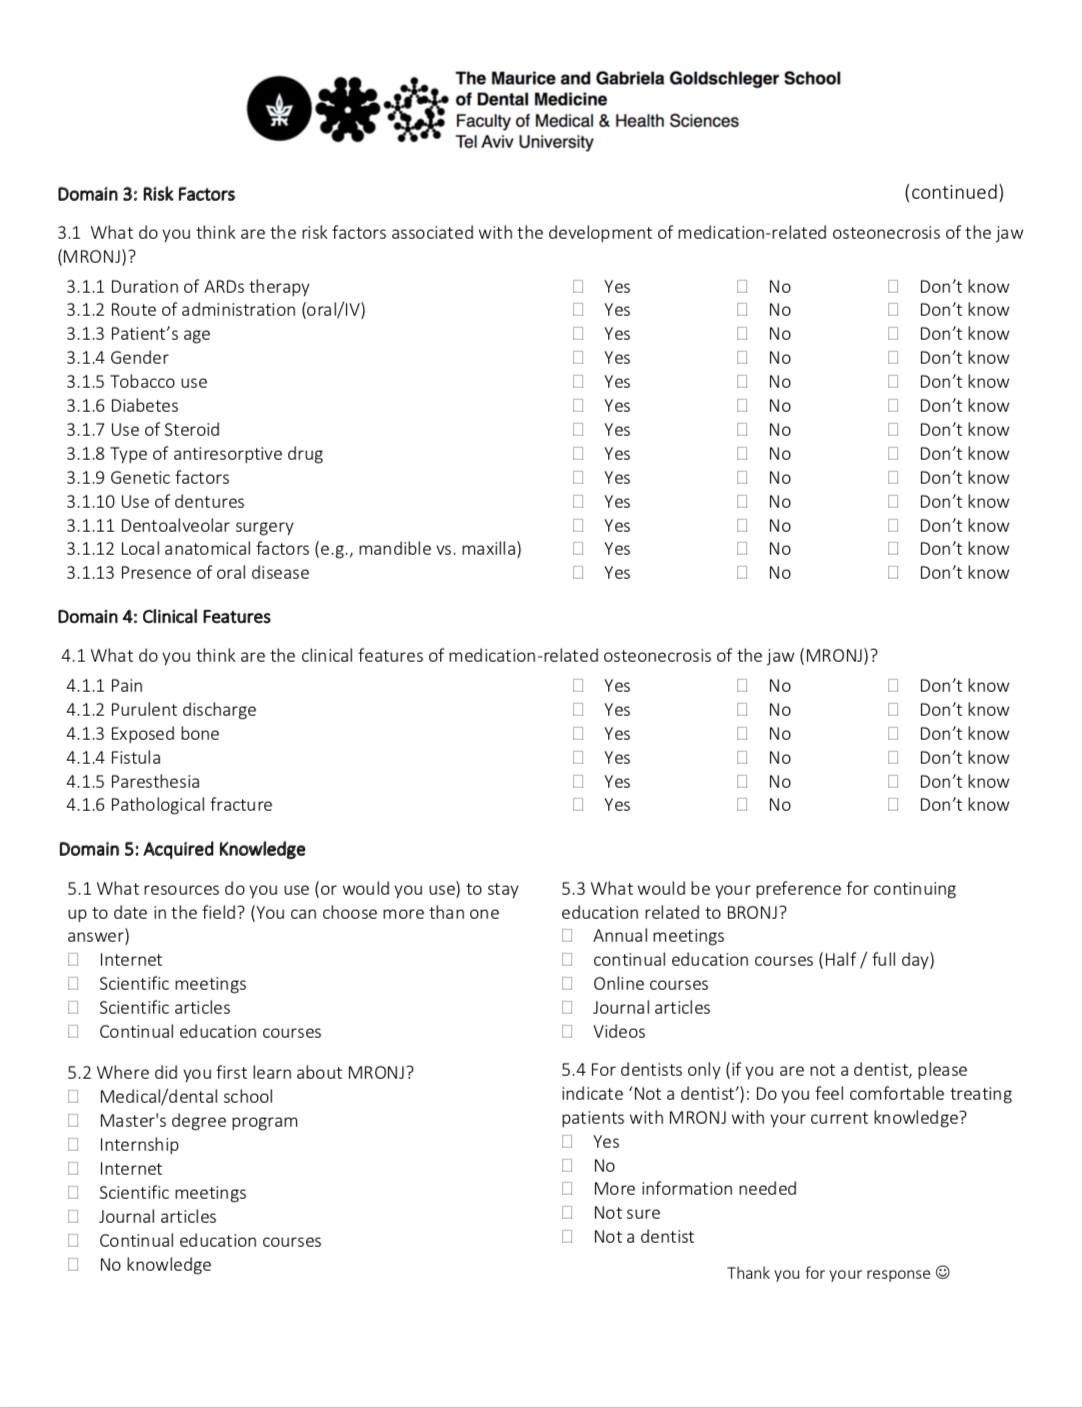

Supplement: Supplementary file 1 [file 1671b7c9d2392a0f4a45d07c.docx]
